# Supplementary material for: More than ADEQUATE: doubling the sensitivity of 13CH–13CH correlations in double-quantum NMR experiments
Source: Royal Society of Chemistry journal article supplement (doi:10.1039/d2cc05214h), 2022-01-01
Supplement: d2cc05214h1.pdf [file d2cc05214h1.pdf]

# More than ADEQUATE: doubling the sensitivity of $^{13}\text{C}$ – $^{13}\text{C}$ double-quantum NMR experiments

Justinas Sakas and Dušan Uhrín\*

EaStCHEM School of Chemistry, University of Edinburgh, Edinburgh, UK.

E-mail: dusan.uhrin@ed.ac.uk

## Electronic Supplementary Information

### Table of Contents

|                                                                                                                 |    |
|-----------------------------------------------------------------------------------------------------------------|----|
| 1. Experimental parameters .....                                                                                | 2  |
| 2. Removal of cancellation artefacts .....                                                                      | 4  |
| 3. Comparison of ADEQUATE spectra of methyl $\beta$ -D-xylopyranoside, I .....                                  | 5  |
| 4. CH-detected CH-CH <sub>2</sub> , CH-CH <sub>3</sub> and CH-C <sub>q</sub> correlations of L-isoleucine ..... | 7  |
| 5. Comparison of ADEQUATE spectra of strychnine, II .....                                                       | 8  |
| 6. Comparison of ADEQUATE spectra of fondaparinux, III.....                                                     | 11 |
| 7. $^1J_{\text{CH}}$ -refocussed DQ ADEQUATE pulse program.....                                                 | 15 |
| 8. $^1J_{\text{CH}}$ -refocussed SQ ADEQUATE pulse program .....                                                | 19 |

### Figures

|                                                                                                                                |    |
|--------------------------------------------------------------------------------------------------------------------------------|----|
| Fig. S1. $^1J_{\text{CH}}$ -refocussed ADEQUATE pulse sequence .....                                                           | 2  |
| Fig. S2. Removal of cancellation artefacts using a purge element.....                                                          | 4  |
| Fig. S3. Comparison of $^1J_{\text{CC}}$ -optimised ADEQUATE spectra of methyl $\beta$ -D-xylopyranoside .....                 | 5  |
| Fig. S4. SNR improvement for I in the $^1J_{\text{CH}}$ -refocussed ADEQUATE experiments .....                                 | 6  |
| Fig. S5. Comparison of $^1J_{\text{CC}}$ -optimised ADEQUATE spectra of L-isoleucine.....                                      | 7  |
| Fig. S6. $^1J_{\text{CC}}$ -optimised SQ ADEQUATE spectra of strychnine with and without $^1J_{\text{CH}}$ refocussing .....   | 8  |
| Fig. S7. $^nJ_{\text{CC}}$ -optimised SQ ADEQUATE spectra of strychnine with and without $^1J_{\text{CH}}$ refocussing .....   | 9  |
| Fig. S8. $^1J_{\text{CC}}$ -optimised SQ ADEQUATE spectra of fondaparinux with and without $^1J_{\text{CH}}$ refocussing.....  | 11 |
| Fig. S9. $^nJ_{\text{CC}}$ -optimised SQ ADEQUATE spectra of fondaparinux with and without $^1J_{\text{CH}}$ refocussing ..... | 12 |
| Fig. S10. Projections of ADEQUATE spectra of fondaparinux.....                                                                 | 13 |
| Fig. S11. Labelled structure of fondaparinux.....                                                                              | 13 |

### Tables

|                                                                                                                                                                  |    |
|------------------------------------------------------------------------------------------------------------------------------------------------------------------|----|
| Table S1. SNR comparison for strychnine correlations in $^1J_{\text{CC}}$ -optimised SQ ADEQUATE spectra with and without $^1J_{\text{CH}}$ -refocussing.....    | 10 |
| Table S2. SNR comparison for strychnine correlations in $^nJ_{\text{CC}}$ -optimised SQ ADEQUATE spectra with and without $^1J_{\text{CH}}$ -refocussing.....    | 10 |
| Table S3. SNR comparison for fondaparinux correlations in $^1J_{\text{CC}}$ -optimised SQ ADEQUATE spectra with and without $^1J_{\text{CH}}$ -refocussing. .... | 14 |
| Table S4. SNR comparison for fondaparinux correlations in $^nJ_{\text{CC}}$ -optimised SQ ADEQUATE spectra with and without $^1J_{\text{CH}}$ -refocussing.....  | 14 |

## 1. Experimental parameters

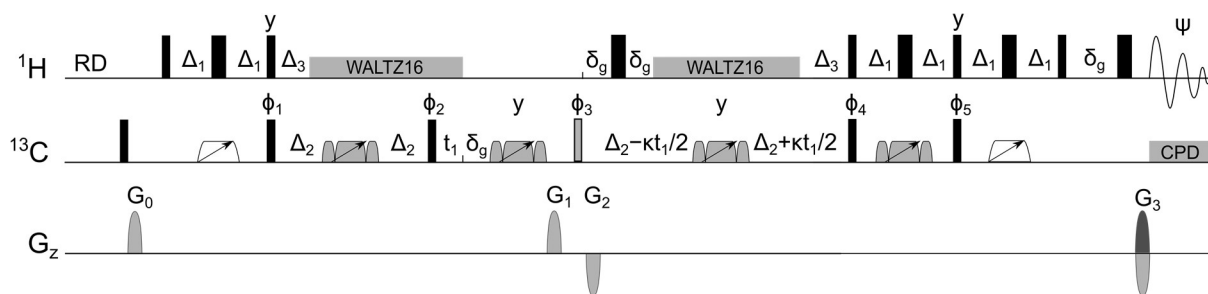

**Fig. S1.**  $^1J_{CH}$ -refocused ADEQUATE pulse sequence. Narrow and wide bars represent  $90^\circ$  and  $180^\circ$  pulses, respectively. The grey narrow bar represents a  $120^\circ$   $^{13}C$  pulse. If  $\kappa = 0$ , double-quantum chemical shift is obtained in  $F_1$ . If  $\kappa = 1$ , single-quantum  $^{13}C$  chemical shift is obtained in  $F_1$ . White and grey shapes with inclined arrows represent  $180^\circ$  inversion chirp (*Crp60,0.5,20.1*, 500  $\mu s$ ) and composite  $180^\circ$  refocussing chirp (*Crp60comp.4*, 2000  $\mu s$ ) pulses, respectively. Pulses were applied from the  $x$ -axis, unless stated otherwise;  $\phi_1 = x, -x$ ;  $\phi_2 = 4(y), 4(-y)$ ;  $\phi_3 = 8(y), 8(-y)$ ;  $\phi_4 = x, x, -x, -x$ ;  $\phi_5 = y, y, -y, -y$ ;  $\psi = -y, y, y, -y, y, -y, -y, y, y, -y, -y, y, -y, y, y, -y$ . The following delays were used:  $\Delta_1 = 1/(4^1J_{CH})$ ,  $\Delta_2 = 1/(4^1J_{CC})$ ,  $\Delta_3 = 1/(2^1J_{CH})$ ,  $\delta_g = 1.2$  ms. Smoothed square shaped gradient pulses of 1 ms duration were used, followed by a 0.2 ms recovery delay. The gradient strengths were:  $G_0 = -23\%$ ,  $G_1 = 78.5\%$ ,  $G_2 = -77.6\%$ ,  $G_3 = -59\%$ , where 100% is equivalent to 53 G  $cm^{-1}$ . Phase-sensitive detection in  $F_1$  was achieved by using echo-antiecho selection, by incrementing  $\phi_5$  by  $180^\circ$  and inverting the sign of  $G_3$ . GARP4 decoupling was used during acquisition.

The modified ADEQUATE experiments were developed based on *adeq11etgpsp* (DQ version) and *adeq11etgprdsp* (SQ version) pulse programs from the *TopSpin 4.1.4* library. The  $^1J_{CH}$ -refocused ADEQUATE pulse sequences are shown in Fig. S1 and the Bruker pulse programs are provided in Sections 6 and 7 of the ESI. Spectra were recorded on a Bruker Avance Neo 800 MHz spectrometer equipped with a TCI three-channel cryoprobe using a 1.1 M sample of methyl  $\beta$ -D-xylopyranoside (I), a 32 mM sample of strychnine (II), and a 19.3 mM sample of fondaparinux (III). For I and III,  $\Delta_1$  and  $\Delta_2$  delays were optimised for  $^1J_{CH} = 155$  Hz and  $^1J_{CC} = 45$  Hz or  $^nJ_{CC} = 6$  Hz, respectively; for II, they were optimised for  $^1J_{CH} = 150$  Hz and  $^1J_{CC} = 50$  Hz or  $^nJ_{CC} = 6$  Hz, respectively. The spectra shown in Fig. S4 were recorded using a 0.5 M sample of L-isoleucine, optimised for  $^1J_{CH} = 140$  Hz and  $^1J_{CC} = 40$  Hz.

For  $^1J_{CC}$ -optimised ADEQUATE spectra of I and L-isoleucine, 1536 and 120 time domain points were acquired in  $F_2$  and  $F_1$ , respectively. The  $^1H$  and  $^{13}C$  spectral widths were 6.07 and 70 ppm, corresponding to acquisition times of 158 ms and 4.3 ms in  $F_2$  and  $F_1$ , respectively. The spectrometer offsets were set to 4.7 ppm and 78 ppm for  $^1H$  and  $^{13}C$ , respectively. 64 dummy scans, followed by 8 scans per increment were acquired for one-bond experiments. The relaxation delay was 1.5 s. The processed spectrum size was 4096 $\times$ 1024, with forward linear prediction in  $F_1$  and zero filling in  $F_2$ ; both dimensions were apodised using a cosine square window function. The total experiment time was 29 min 36 s.

For  $^nJ_{CC}$ -optimised ADEQUATE spectra of I, 1536 and 256 time domain points were acquired in  $F_2$  and  $F_1$ , respectively. The  $^1H$  and  $^{13}C$  spectral widths were 6.07 and 70 ppm, corresponding to acquisition times of 158 ms and 9.1 ms in  $F_2$  and  $F_1$ , respectively. The spectrometer offsets were set to 4.7 ppm and 78 ppm for  $^1H$  and  $^{13}C$ , respectively. 64 dummy scans, followed by 16 scans per increment were acquired for one-bond experiments. The relaxation delay was 1.5 s. The processed spectrum size was 4096 $\times$ 1024, with forward linear prediction in  $F_1$  and zero filling in  $F_2$ ; both dimensions were apodised using a cosine square window function. The total experiment time was 2 h 10 min.

For  $^1J_{CC}$ -optimised ADEQUATE spectra of **II**, 1536 and 192 time domain points were acquired in  $F_2$  and  $F_1$ , respectively. The  $^1H$  and  $^{13}C$  spectral widths were 7.82 and 160 ppm, corresponding to acquisition times of 123 ms and 3.0 ms in  $F_2$  and  $F_1$ , respectively. The spectrometer offsets were set to 4.7 ppm and 100 ppm for  $^1H$  and  $^{13}C$ , respectively. 80 scans per increment were acquired, with a relaxation delay of 1.5 s and 128 dummy scans. The processed spectrum size was 4096×1024, with forward linear prediction in  $F_1$  and zero filling in  $F_2$ ; both dimensions were apodised using a cosine square window function. The total experiment time was 7 h 18 min.

For  $^nJ_{CC}$ -optimised ADEQUATE spectra of **II**, 1536 and 192 time domain points were acquired in  $F_2$  and  $F_1$ , respectively. The  $^1H$  and  $^{13}C$  spectral widths were 7.82 and 160 ppm, corresponding to acquisition times of 123 ms and 3.0 ms in  $F_2$  and  $F_1$ , respectively. The spectrometer offsets were set to 4.7 ppm and 100 ppm for  $^1H$  and  $^{13}C$ , respectively. 160 scans per increment were acquired, with a relaxation delay of 1.5 s and 128 dummy scans. The processed spectrum size was 4096×1024, with forward linear prediction in  $F_1$  and zero filling in  $F_2$ ; both dimensions were apodised using a cosine square window function. The total experiment time was 15 h 47 min.

For  $^1J_{CC}$ -optimised ADEQUATE spectra of **III**, 1536 and 118 time domain points were acquired in  $F_2$  and  $F_1$ , respectively. The  $^1H$  and  $^{13}C$  spectral widths were 6.07 and 70 ppm, corresponding to acquisition times of 158 ms and 4.2 ms in  $F_2$  and  $F_1$ , respectively. The spectrometer offsets were set to 4.7 ppm and 78 ppm for  $^1H$  and  $^{13}C$ , respectively. 128 scans per increment were acquired, with a relaxation delay of 1.5 s and 128 dummy scans. The processed spectrum size was 4096×1024, with forward linear prediction in  $F_1$  and zero filling in  $F_2$ ; both dimensions were apodised using a cosine square window function. The total experiment time was 7 h 20 min.

For  $^nJ_{CC}$ -optimised ADEQUATE spectra of **III**, 1536 and 160 time domain points were acquired in  $F_2$  and  $F_1$ , respectively. The  $^1H$  and  $^{13}C$  spectral widths were 6.07 and 70 ppm, corresponding to acquisition times of 158 ms and 5.7 ms in  $F_2$  and  $F_1$ , respectively. The spectrometer offsets were set to 4.7 ppm and 78 ppm for  $^1H$  and  $^{13}C$ , respectively. 256 scans per increment were acquired, with a relaxation delay of 1.5 s and 64 dummy scans. The processed spectrum size was 4096×1024, with forward linear prediction in  $F_1$  and zero filling in  $F_2$ ; both dimensions were apodised using a cosine square window function. The total experiment time was 21 h 26 min.

## 2. Removal of cancellation artefacts

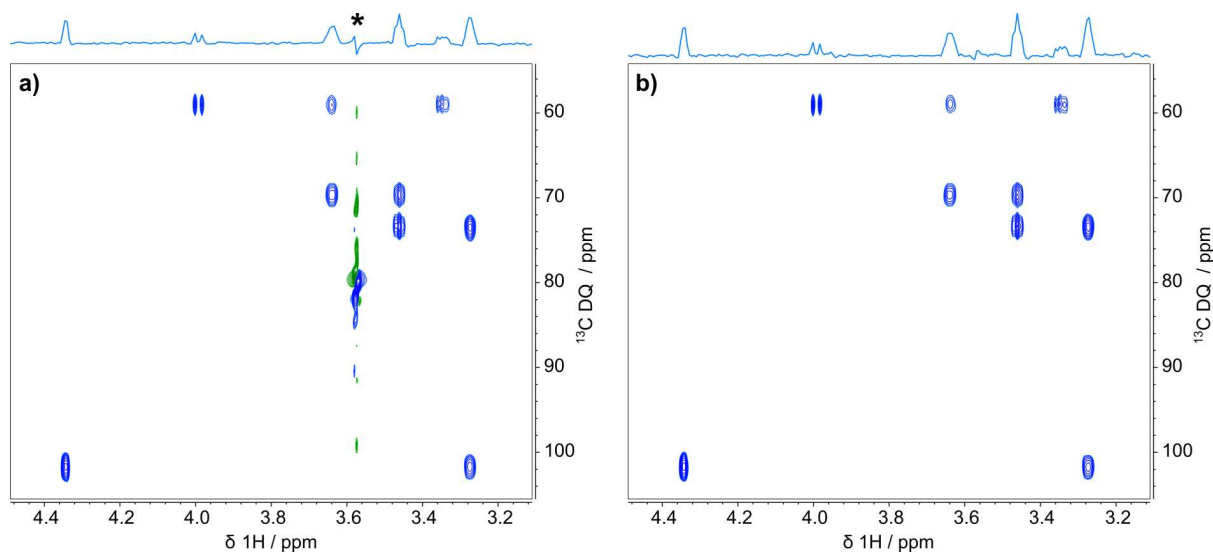

**Fig. S2.** Removal of cancellation artefacts using a purge element. 800 MHz  $^1J_{\text{CC}}$ -optimised DQ ADEQUATE spectrum of **1** recorded using the (a) Bruker library ADEQUATE pulse sequence *adeq11etgpsp* and (b) with the addition of the  $90^\circ$ -gradient purge element, which significantly reduced the  $\text{CH}_3$  cancellation artefacts (\*). Both spectra were recorded using identical parameters.

### 3. Comparison of ADEQUATE spectra of methyl $\beta$ -D-xylopyranoside, **I**

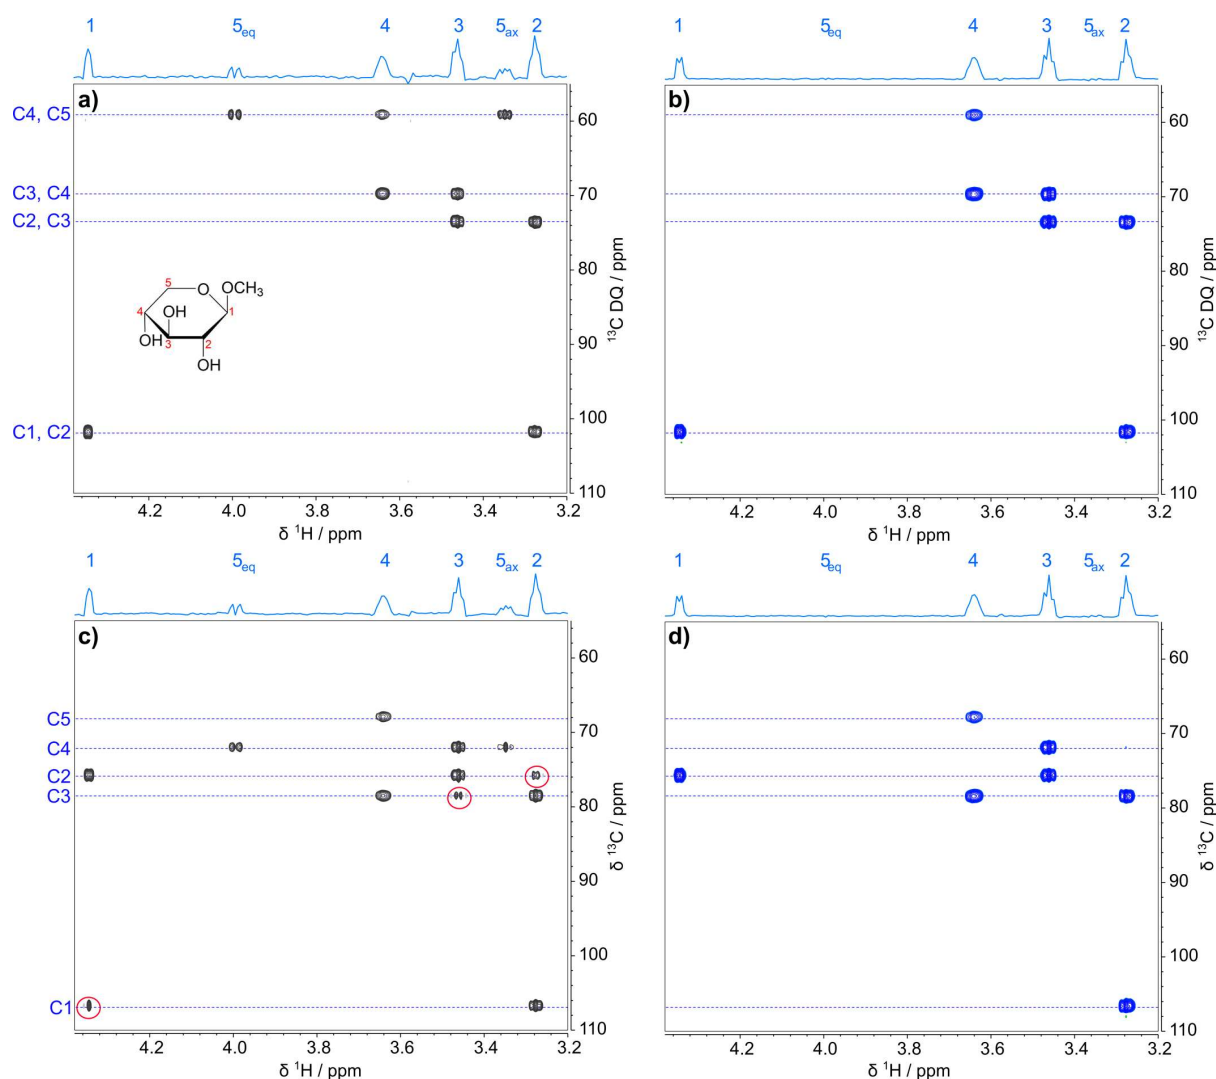

**Fig. S3.** Comparison of  $^1J_{\text{CC}}$ -optimised ADEQUATE spectra of **I**. (a) DQ ADEQUATE without  $^1J_{\text{CH}}$  refocussing, (b) DQ ADEQUATE with  $^1J_{\text{CH}}$  refocussing, (c) SQ ADEQUATE without  $^1J_{\text{CH}}$  refocussing, and (d) SQ ADEQUATE with  $^1J_{\text{CH}}$  refocussing. The DQ ADEQUATE spectra report DQ  $^{13}\text{C}$  frequency and coupled  $^{13}\text{C}$  nuclei appear at the same chemical shift, whereas the SQ ADEQUATE spectra report the conventional  $^{13}\text{C}$  SQ chemical shifts at  $^1\text{H}$  frequencies of the coupled carbons. The addition of  $^1J_{\text{CH}}$  refocussing increases the intensity of CH-detected correlations only, therefore the H5 signals are missing/weak in the refocussed spectra. Note that the HSQC-like artefacts (circled in red), which appear in the standard SQ ADEQUATE spectrum, are removed by using  $^1J_{\text{CH}}$  refocussing. All 2D spectra were plotted at the same intensity level. Positive projections plotted to scale are presented in Fig. 2 in the main text.

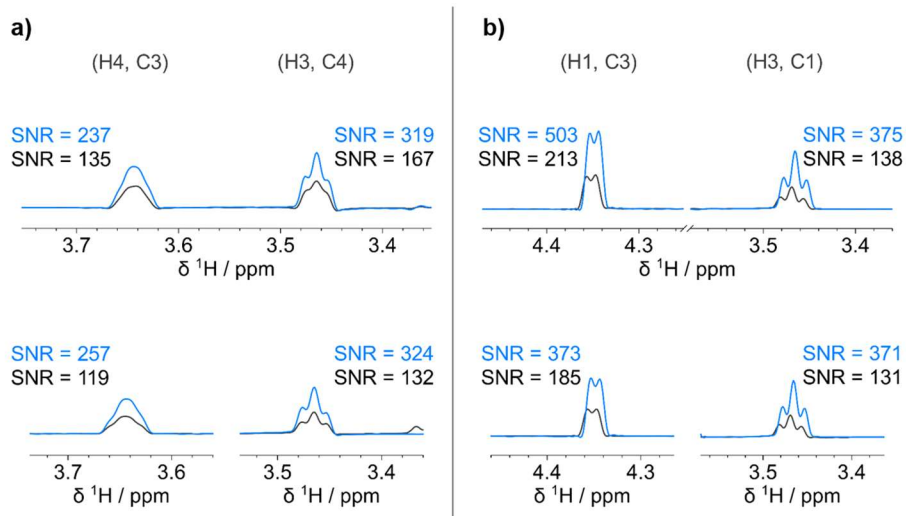

**Fig. S4.** SNR improvement for **I** in the  $^1J_{\text{CH}}$ -refocussed ADEQUATE experiments (blue traces) optimised for (a)  $^1J_{\text{CC}} = 45$  Hz and (b)  $^1J_{\text{CC}} = 6$  Hz. The top spectra, obtained using the DQ ADEQUATE, show the correlated spins sharing a  $^{13}\text{C}$  DQ frequency, whereas for the bottom traces, obtained using SQ ADEQUATE, the corresponding correlations appear at different  $^{13}\text{C}$  frequencies.

#### 4. CH-detected CH<sub>2</sub>, CH<sub>3</sub> and C<sub>q</sub> correlations of L-isoleucine

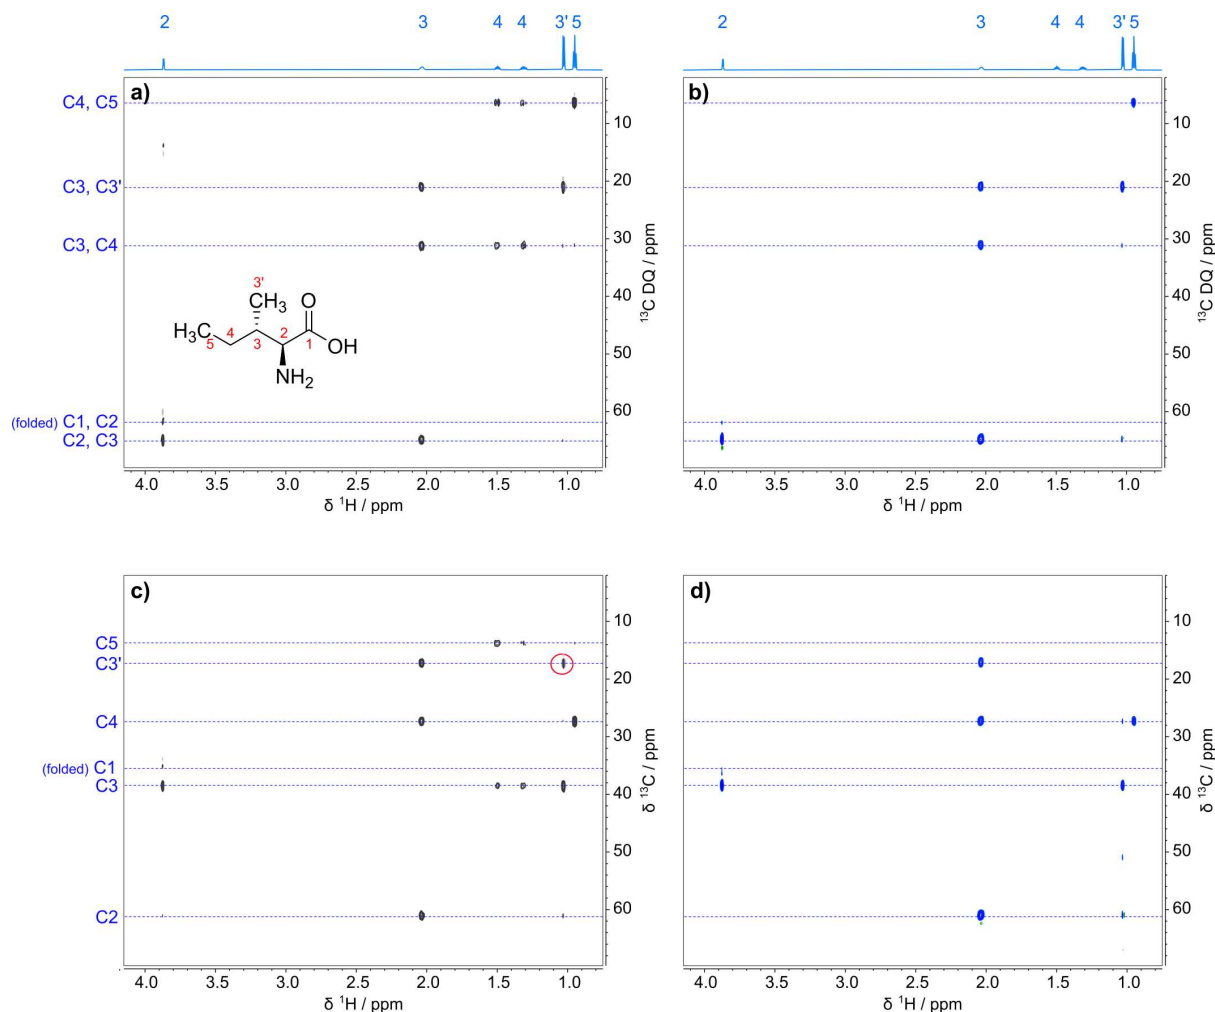

**Fig. S5.** Comparison of  $^1J_{CC}$ -optimised ADEQUATE spectra of L-isoleucine: (a) DQ ADEQUATE without  $^1J_{CH}$  refocussing, (b) DQ ADEQUATE with  $^1J_{CH}$  refocussing, (c) SQ ADEQUATE without  $^1J_{CH}$  refocussing, and (d) SQ ADEQUATE with  $^1J_{CH}$  refocussing. The spectra were acquired using the same parameters as described for I. All spectra are plotted at the same intensity level. Although the  $^1J_{CH}$  refocussing decreases the sensitivity of CH<sub>3</sub>-detected (and more substantially the CH<sub>2</sub>-detected) coherences, connectivity information is not lost as the sensitivity of CH-detected CH-CH<sub>2</sub>, CH-CH<sub>3</sub> and CH-C<sub>q</sub> coherences is improved 1.3–2.0×. An HSQC-like artefact seen in (c) is circled in red. 1D  $^1\text{H}$  NMR spectra of L-isoleucine are shown at the top.

## 5. Comparison of ADEQUATE spectra of strychnine, II

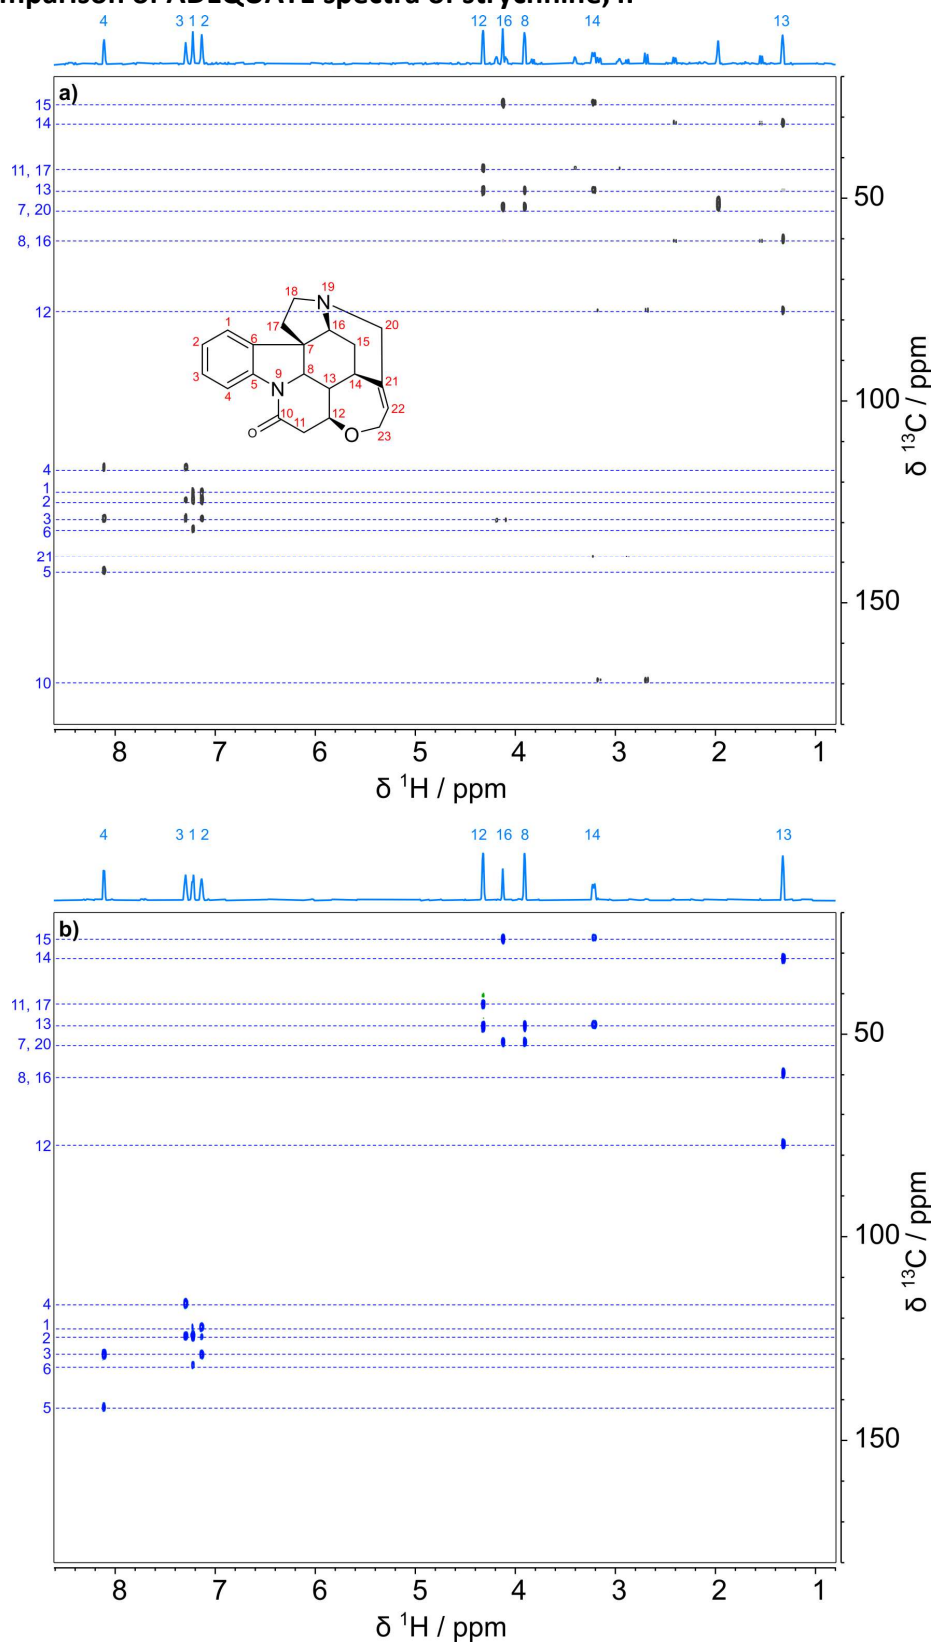

**Fig. S6.**  $^1J_{CC}$ -optimised SQ ADEQUATE spectra of II (a) without  $^1J_{CH}$  refocussing, (b) with  $^1J_{CH}$  refocussing. The spectra were plotted at the same intensity level. For detailed SNR comparison, see Table S1.

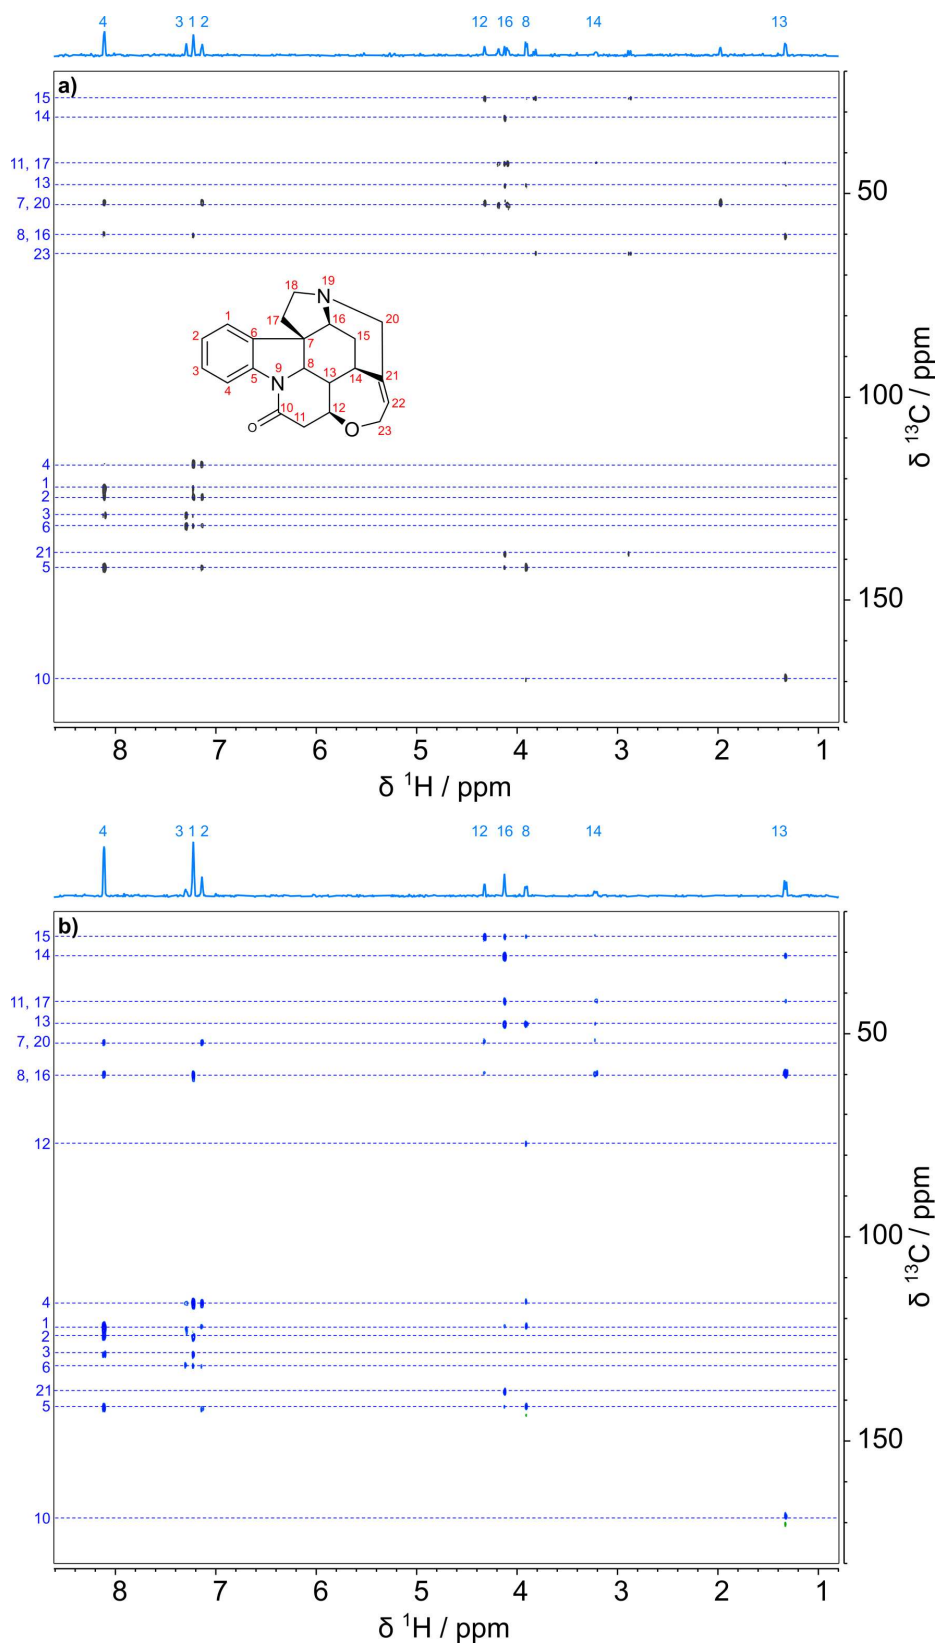

**Fig. S7.**  $^1J_{CC}$ -optimised SQ ADEQUATE spectra of II (a) without  $^1J_{CH}$  refocussing, (b) with  $^1J_{CH}$  refocussing. The spectra were plotted at the same intensity level. For detailed SNR comparison, see Table S2.

**Table S1.** Signal-to-noise ratio (SNR) comparison for CH-detected correlations of **II** observed in  $^1J_{CC}$ -optimised SQ ADEQUATE spectra with and without  $^1J_{CH}$  refocussing.

| Correlation<br>( $^1H$ , $^{13}C$ ) | Signal-to-noise ratio |                        | Correlation<br>( $^1H$ , $^{13}C$ ) | Signal-to-noise ratio |                        |
|-------------------------------------|-----------------------|------------------------|-------------------------------------|-----------------------|------------------------|
|                                     | standard              | $^1J_{CH}$ -refocussed |                                     | standard              | $^1J_{CH}$ -refocussed |
| 1, 2 <sup>a</sup>                   | 14.5                  | 31.8                   | 12, 11 <sup>b</sup>                 | 26.6                  | 32.3                   |
| 1, 6 <sup>c</sup>                   | 21.8                  | 17.6                   | 12, 13 <sup>a</sup>                 | 31.6                  | 45.1                   |
| 2, 1 <sup>a</sup>                   | 11.9                  | 20.3                   | 13, 8 <sup>a</sup>                  | 22.1                  | 50.6                   |
| 2, 3 <sup>a</sup>                   | 14.8                  | 26.8                   | 13, 12 <sup>a</sup>                 | 17.0                  | 49.9                   |
| 3, 2 <sup>a</sup>                   | 13.0                  | 26.7                   | 13, 14 <sup>a</sup>                 | 21.1                  | 47.5                   |
| 3, 4 <sup>a</sup>                   | 14.2                  | 29.2                   | 14, 13 <sup>a</sup>                 | 12.4                  | 16.2                   |
| 4, 3 <sup>a</sup>                   | 22.7                  | 36.1                   | 14, 15 <sup>b</sup>                 | 12.2                  | 12.9                   |
| 4, 5 <sup>c</sup>                   | 18.7                  | 17.7                   | 16, 7 <sup>c</sup>                  | 35.4                  | 31.7                   |
| 8, 7 <sup>c</sup>                   | 28.6                  | 25.9                   | 16, 15 <sup>b</sup>                 | 30.0                  | 34.8                   |
| 8, 13 <sup>a</sup>                  | 29.8                  | 44.9                   |                                     |                       |                        |

<sup>a</sup> CH-CH, <sup>b</sup> CH-CH<sub>2</sub>, <sup>c</sup> CH-C<sub>q</sub> correlations.

**Table S2.** Signal-to-noise ratio (SNR) comparison for CH-detected correlations of **III** observed in  $^1J_{CC}$ -optimised SQ ADEQUATE spectra with and without  $^1J_{CH}$  refocussing.

| Correlation<br>( $^1H$ , $^{13}C$ ) | Signal-to-noise ratio |                        | Correlation<br>( $^1H$ , $^{13}C$ ) | Signal-to-noise ratio |                        |
|-------------------------------------|-----------------------|------------------------|-------------------------------------|-----------------------|------------------------|
|                                     | standard              | $^1J_{CH}$ -refocussed |                                     | standard              | $^1J_{CH}$ -refocussed |
| 1, 3 <sup>a</sup>                   | 3.7                   | 7.7                    | 8, 4 <sup>a</sup>                   | – <sup>e</sup>        | 5.4                    |
| 1, 4 <sup>a</sup>                   | 15.7                  | 45.2                   | 8, 5 <sup>c</sup>                   | 11.8                  | 8.6                    |
| 1, 5 <sup>c</sup>                   | 3.8                   | 2.7 <sup>d</sup>       | 12, 15 <sup>b</sup>                 | 7.0                   | 9.2                    |
| 1, 7 <sup>c</sup>                   | 3.6                   | 5.3                    | 12, 7 <sup>c</sup>                  | 6.7                   | 7.0                    |
| 1, 8 <sup>a</sup>                   | 5.5                   | 13.8                   | 12, 8 <sup>a</sup>                  | 3.0 <sup>d</sup>      | 4.1                    |
| 2, 4 <sup>a</sup>                   | 7.7                   | 17.5                   | 13, 10 <sup>c</sup>                 | 5.1                   | 7.0                    |
| 2, 5 <sup>c</sup>                   | 6.3                   | 5.1                    | 13, 11 <sup>b</sup>                 | 3.1                   | 5.2                    |
| 2, 6 <sup>c</sup>                   | 4.4                   | 4.3                    | 13, 16 <sup>a</sup>                 | 4.3                   | 12.1                   |
| 2, 7 <sup>c</sup>                   | 8.0                   | 9.4                    | 13, 7 <sup>c</sup>                  | 2.2 <sup>d</sup>      | 4.0                    |
| 3, 1 <sup>a</sup>                   | 2.0 <sup>d</sup>      | 4.6                    | 14, 11 <sup>b</sup>                 | 3.9                   | 5.1                    |
| 3, 5 <sup>c</sup>                   | 2.5 <sup>d</sup>      | 3.3                    | 14, 7 <sup>c</sup>                  | 4.1                   | 3.7                    |
| 3, 6 <sup>c</sup>                   | 7.6                   | 6.5                    | 14, 8 <sup>a</sup>                  | 2.8 <sup>d</sup>      | 5.3                    |
| 4, 1 <sup>a</sup>                   | 15.9                  | 41.2                   | 16, 1 <sup>a</sup>                  | – <sup>e</sup>        | 5.0                    |
| 4, 2 <sup>a</sup>                   | 7.7                   | 11.8                   | 16, 13 <sup>a</sup>                 | 4.1                   | 15.1                   |
| 4, 7 <sup>c</sup>                   | 9.7                   | 8.2                    | 16, 14 <sup>a</sup>                 | 6.1                   | 16.8                   |
| 4, 8 <sup>a</sup>                   | 4.9                   | 9.4                    | 16, 17 <sup>b</sup>                 | 3.5                   | 8.7                    |
| 8, 1 <sup>a</sup>                   | 4.1                   | 8.3                    | 16, 21 <sup>c</sup>                 | 5.9                   | 8.4                    |
| 8, 12 <sup>a</sup>                  | – <sup>e</sup>        | 5.3                    | 16, 5 <sup>c</sup>                  | 5.7                   | 5.2                    |
| 8, 15 <sup>b</sup>                  | 5.1                   | 4.8                    |                                     |                       |                        |

<sup>a</sup> CH-CH, <sup>b</sup> CH-CH<sub>2</sub>, <sup>c</sup> CH-C<sub>q</sub> correlations. <sup>d</sup> Correlations with SNR ≤ 3 cannot be distinguished from noise without prior knowledge. <sup>e</sup> Not observed.

## 6. Comparison of ADEQUATE spectra of fondaparinux, III

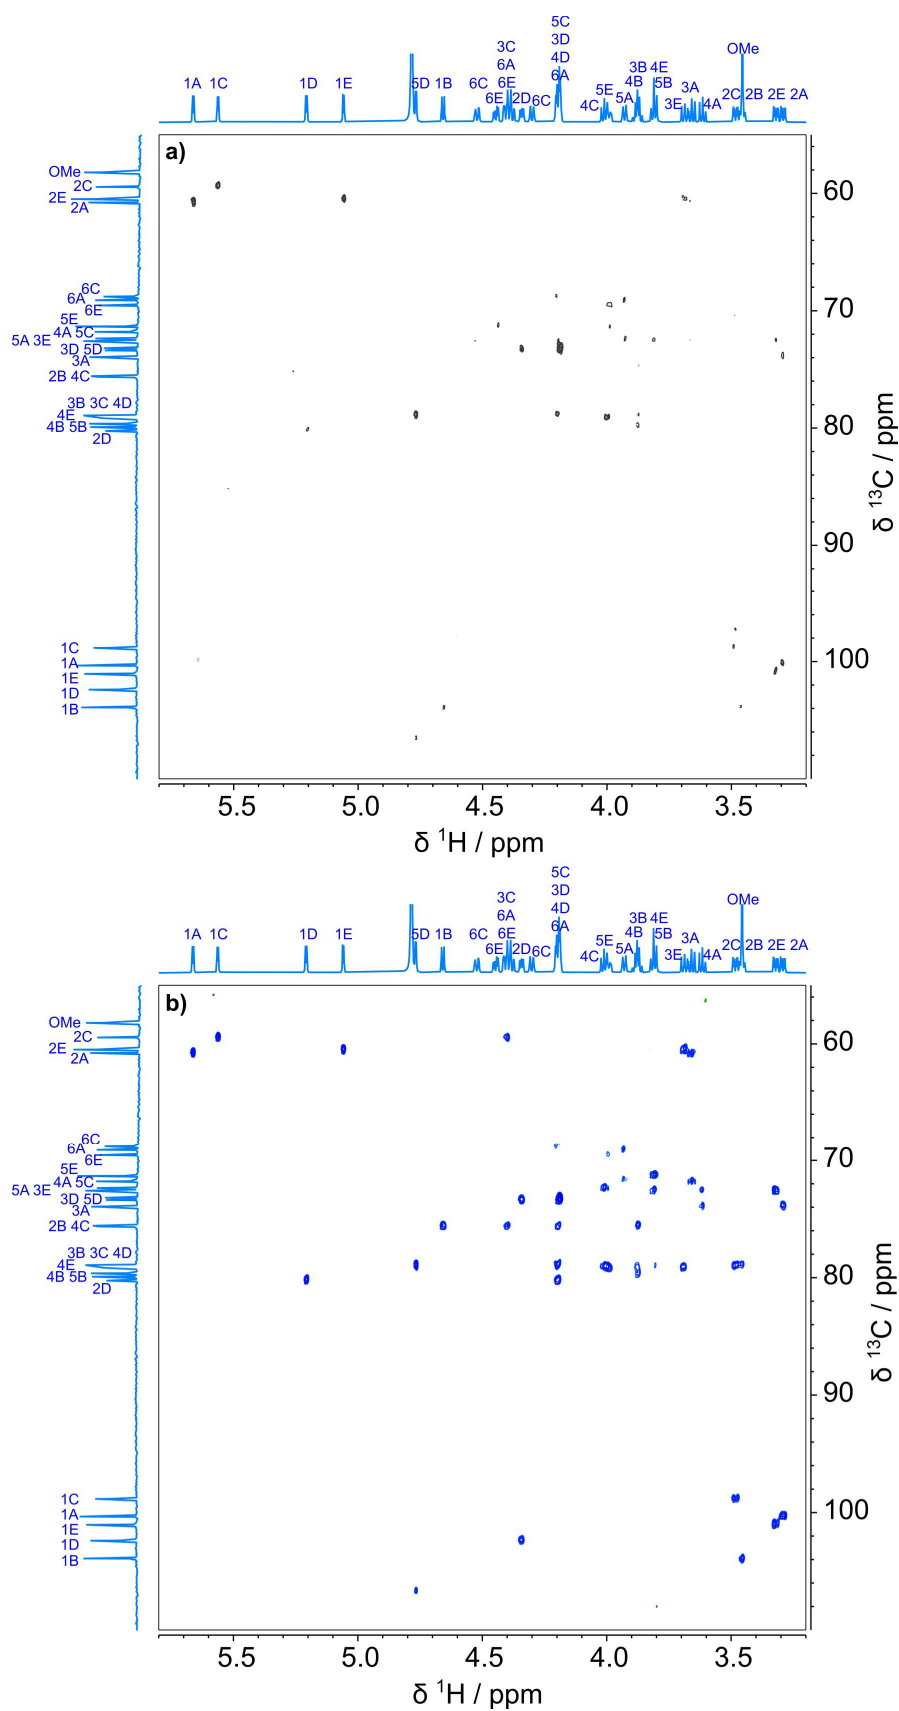

**Fig. S8.**  $^1J_{CC}$ -optimised SQ ADEQUATE spectra of III (a) without  $^1J_{CH}$  refocussing, (b) with  $^1J_{CH}$  refocussing. The spectra were plotted at the same intensity level.

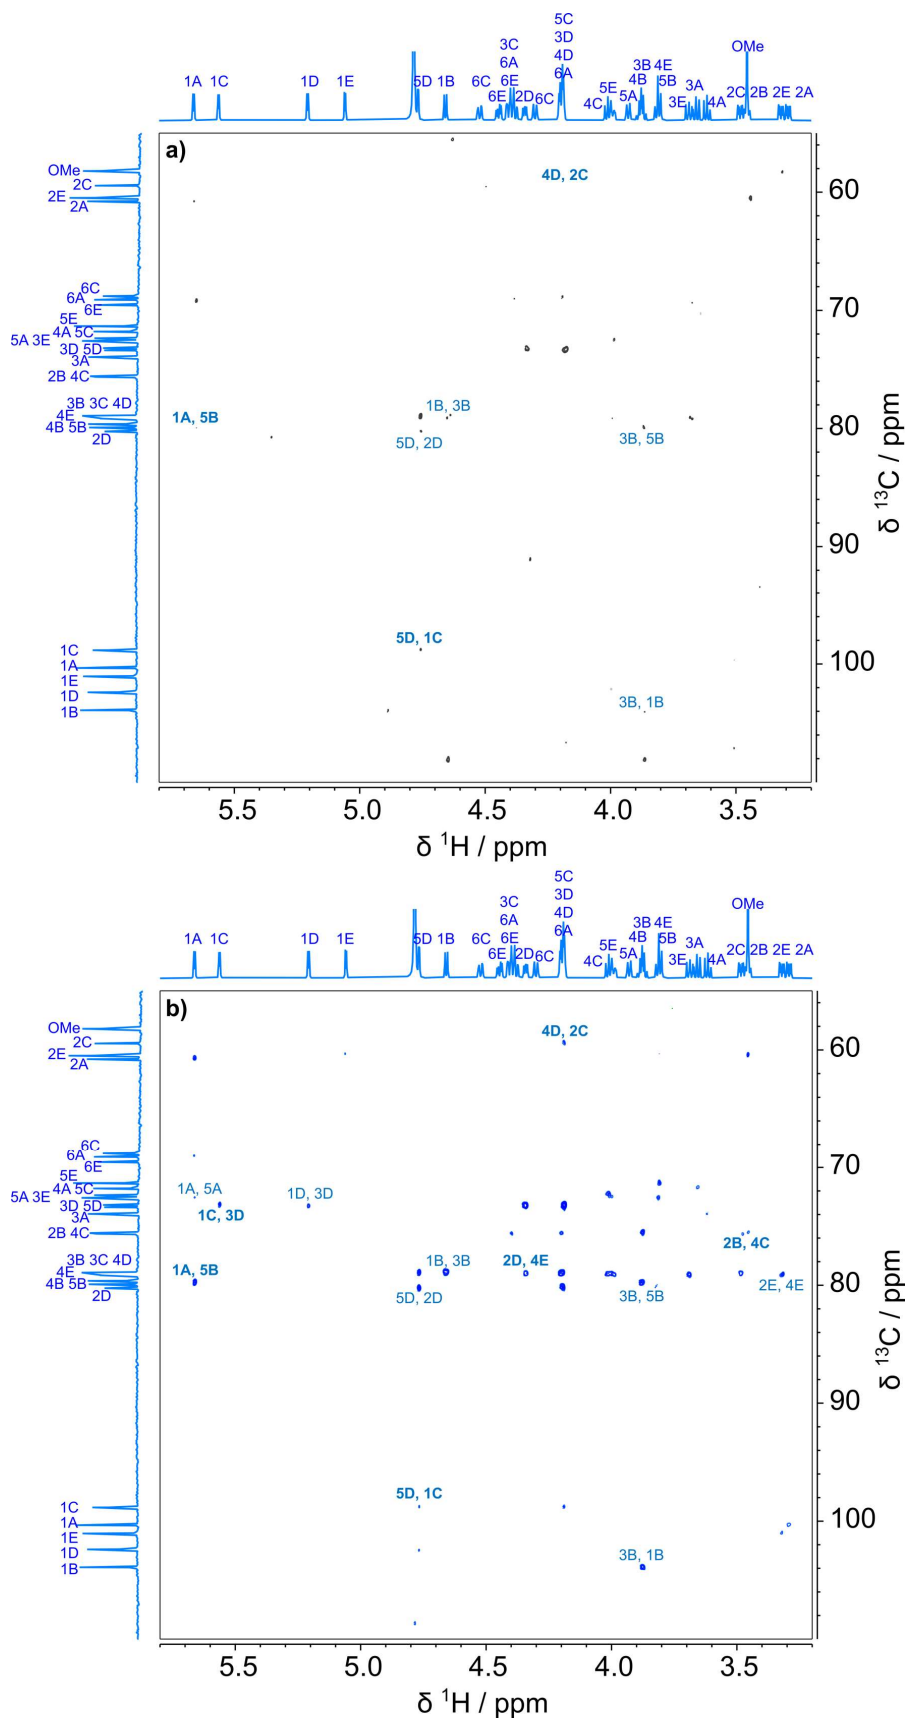

**Fig. S9.**  $^nJ_{\text{CC}}$ -optimised SQ ADEQUATE spectra of **III** (a) without  $^1J_{\text{CH}}$  refocussing, (b) with  $^1J_{\text{CH}}$  refocussing. Correlations across glycosidic linkages are labelled in bold. Spectra were plotted at the same intensity level. The unlabelled cross peaks are due to one-bond C–C correlations (*cf.* Fig. S8).

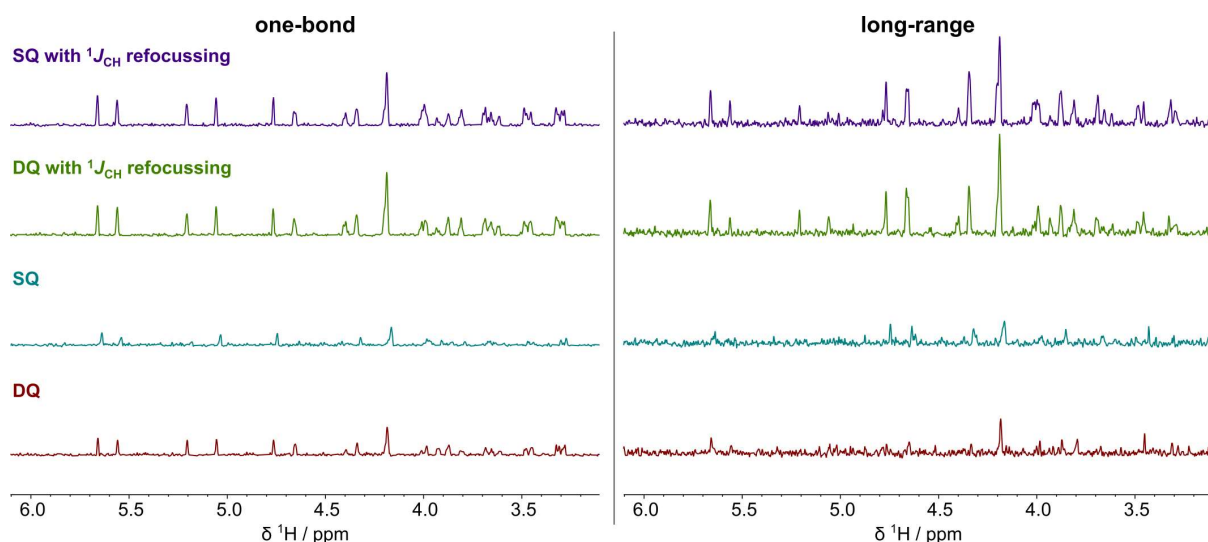

**Fig. S10.** Projections of ADEQUATE spectra of **III** optimised for one-bond (45 Hz, 128 scans) and long-range (6 Hz, 256 scans)  $J_{CC}$  couplings. Projections in the same column are plotted to scale.

The comparisons of SQ ADEQUATE spectra with and without  $^1J_{CH}$  refocussing are shown in **Fig. S8** and **Fig. S9** for one-bond and long-range-optimised correlations, respectively. To-scale positive projections, including DQ ADEQUATE (full 2D spectra not shown), are presented in **Fig. S10**. Please refer to **Fig. S11** for atom labelling. Only long-range CH–CH correlations are labelled in **Fig. S9**. Appearance of one-bond correlations in the long-range optimised experiments is possible due to the fast evolution of the  $^1J_{CC}$  coupling constant, these correlations were identified by comparison with the  $^1J_{CC}$ -optimised spectra. The long-range SQ ADEQUATE spectra provide valuable structural information regarding the connectivity of the monosaccharide units within the pentasaccharide, these correlations are labelled in bold.

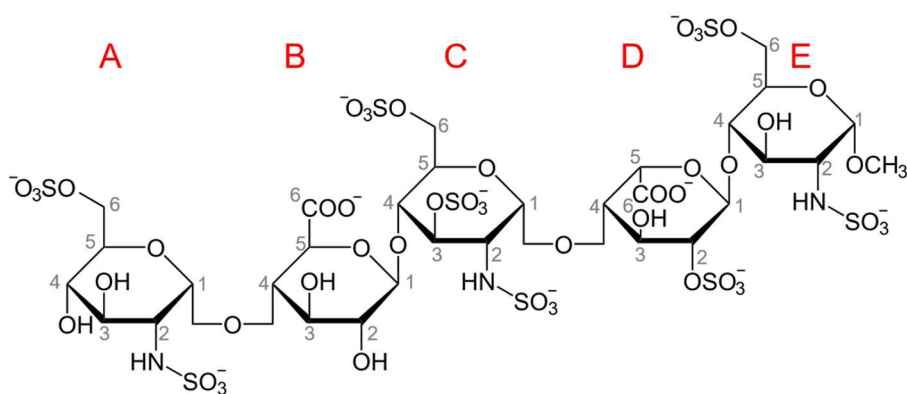

**Fig. S11.** Labeled structure of fondaparinux (**III**).

**Table S3.** Signal-to-noise ratio (SNR) comparison for correlations of **III** observed in  $^1J_{CC}$ -optimised SQ ADEQUATE spectra with and without  $^1J_{CH}$  refocussing.

| Correlation<br>( $^1H$ , $^{13}C$ ) | Signal-to-noise ratio |                        | Correlation<br>( $^1H$ , $^{13}C$ ) | Signal-to-noise ratio |                        |
|-------------------------------------|-----------------------|------------------------|-------------------------------------|-----------------------|------------------------|
|                                     | standard              | $^1J_{CH}$ -refocussed |                                     | standard              | $^1J_{CH}$ -refocussed |
| 1A, 2A                              | 8.9                   | 15.5                   | 3C, 4C                              | 2.2 <sup>a</sup>      | 7.8                    |
| 2A, 1A                              | 4.1                   | 7.5                    | 4C, 3C                              | 4.1                   | 10.7                   |
| 2A, 3A                              | 3.3                   | 7.2                    | 4C, 5C                              | 2.6 <sup>a</sup>      | 6.3                    |
| 3A, 2A                              | 3.8                   | 7.5                    | 5C, 4C                              | — <sup>b</sup>        | 7.3                    |
| 3A, 4A                              | 2.3 <sup>a</sup>      | 5.4                    | 1D, 2D                              | 3.4                   | 11.3                   |
| 4A, 3A                              | 2.0 <sup>a</sup>      | 6.1                    | 2D, 1D                              | 3.1                   | 6.5                    |
| 4A, 5A                              | — <sup>b</sup>        | 4.9                    | 2D, 3D                              | 4.9                   | 7.3                    |
| 5A, 4A                              | — <sup>b</sup>        | 3.6                    | 3D, 2D                              | 2.6 <sup>a</sup>      | 9.2                    |
| 1B, 2B                              | 2.2 <sup>a</sup>      | 9.6                    | 3D, 4D                              | 3.6                   | 9.0                    |
| 2B, 1B                              | 3.4                   | 7.2                    | 4D, 3D                              | 10.0 <sup>d,e</sup>   | 25.5 <sup>e</sup>      |
| 2B, 3B                              | — <sup>b</sup>        | 5.9                    | 4D, 5D                              | 10.0 <sup>e</sup>     | 25.5 <sup>e</sup>      |
| 3B, 2B                              | 2.9 <sup>a</sup>      | 8.4                    | 5D, 4D                              | 6.6                   | 14.5                   |
| 3B, 4B                              | — <sup>b,c</sup>      | — <sup>b,c</sup>       | 1E, 2E                              | 6.9                   | 16.0                   |
| 4B, 3B                              | — <sup>b,c</sup>      | — <sup>b,c</sup>       | 2E, 1E                              | 4.6                   | 8.3                    |
| 4B, 5B                              | 3.7 <sup>d</sup>      | 5.2                    | 2E, 3E                              | 3.5                   | 8.5                    |
| 5B, 4B                              | — <sup>b,c</sup>      | — <sup>b,c</sup>       | 3E, 2E                              | 3.8                   | 11.2                   |
| 1C, 2C                              | 4.8                   | 17.3                   | 3E, 4E                              | 2.6 <sup>a</sup>      | 7.3                    |
| 2C, 1C                              | 3.0 <sup>a</sup>      | 6.5                    | 4E, 3E                              | 3.2                   | 6.6                    |
| 2C, 3C                              | 2.5 <sup>a</sup>      | 10.0                   | 4E, 5E                              | 3.5                   | 8.4                    |
| 3C, 2C                              | 2.6 <sup>a</sup>      | 9.4                    | 5E, 4E                              | — <sup>b</sup>        | — <sup>b</sup>         |

<sup>a</sup> Correlations with SNR  $\leq 3$  cannot be distinguished from noise without prior knowledge. <sup>b</sup> Not observed. <sup>c</sup> The lack of observable correlation could be explained by strong coupling between protons and/or carbons involved in the coherence. <sup>d</sup> Correlation intensity may be affected by HSQC-like artefact. <sup>e</sup> Overlapping correlations.

**Table S4.** Signal-to-noise ratio (SNR) comparison for select correlations of **III** observed in  $^nJ_{CC}$ -optimised SQ ADEQUATE spectra with and without  $^1J_{CH}$  refocussing. Correlations between adjacent monomer units are presented in bold as these provide important linkage information.

| Correlation<br>( $^1H$ , $^{13}C$ ) | Signal-to-noise ratio |                        |
|-------------------------------------|-----------------------|------------------------|
|                                     | standard              | $^1J_{CH}$ -refocussed |
| 1A, 5A                              | — <sup>b</sup>        | 3.7                    |
| <b>1A, 5B</b>                       | 2.7                   | 6.2                    |
| 1B, 3B                              | 2.9                   | 6.0                    |
| <b>2B, 4C</b>                       | — <sup>b</sup>        | 3.3                    |
| 3B, 1B                              | 2.2                   | 5.5                    |
| 3B, 5B                              | 2.8                   | 5.3                    |
| <b>1C, 3D</b>                       | 2.5                   | 4.7                    |
| 1D, 3D                              | — <sup>b</sup>        | 3.2                    |
| <b>2D, 4E</b>                       | 2.7                   | 8.2                    |
| <b>4D, 2C</b>                       | — <sup>b</sup>        | 4.5                    |
| <b>5D, 1C</b>                       | 3.1                   | 4.1                    |
| 5D, 2D                              | 3.1                   | 7.4                    |
| 2E, 4E                              | — <sup>b</sup>        | 5.4                    |

<sup>a</sup> Correlations with SNR  $\leq 3$  cannot be distinguished from noise without prior knowledge. <sup>b</sup> Not observed.

## 7. $^1J_{CH}$ -refocussed DQ ADEQUATE pulse program

```
;adeq11etgppsp.js
;based on adeq11etgppsp
;1,1/1,n-ADEQUATE: 2D-HSQC-1J(CC)/nJ(CC)-ADEQUATE
;          using sensitivity improvement
;phase sensitive using Echo/Antiecho gradient selection
;with decoupling during acquisition
;using shaped pulses for 180degree pulses on f2 - channel
;with 1JCH refocussing and 1H decoupling for sensitivity improvement
;DQ in F1
;
;J. Sakas & D. Uhrin
;B. Reif, M. Koeck, R. Kerssebaum, H. Kang, W. Fenical & C. Griesinger
;  J. Magn. Reson. A118, 282-285 (1996).
;
;$CLASS=HighRes
;$DIM=2D
;$TYPE=
;$SUBTYPE=
;$COMMENT=

#include <Avance.incl>
#include <Delay.incl>
#include <Grad.incl>

"p2=p1*2"
"p0=p3*4/3"

"d0=3u"
"d11=30m"

"d3=1s/(cnst2*2)-4u"
"d4=1s/(cnst2*4)"
"d23=1s/(cnst3*4)"
"d24=1s/(cnst2*4)"

"in0=inf1/2"

"DELTA1=p16+d16-d0*2+4u"
"DELTA2=p16+d16+8u"
"DELTA3=d23-p24/2-d16-p16-d16-p16-8u"
"DELTA4=d4-p14/2"
"DELTA5=d23-p24/2-4u"
"DELTA6=d4-cnst17*p24/2-4u"
"DELTA7=d23-d3-p24/2-4u"

1 ze
  d11 p112:f2
2 d11 do:f2
  4u BLKGRAD
  d1 p12:f2
  (p3 ph1):f2
  4u p11:f1
  50u UNBLKGRAD
```

```

p16:gp7
d16
3 (p1 ph1)
4u
DELTA4 p10:f2
(center (p2 ph1) (p14:sp3 ph1):f2 )
4u
DELTA4 p12:f2
(p1 ph2) (p3 ph4):f2
4u
d3 p10:f2 p119:f1
DELTA7 cpds1:f1
(p24:sp7 ph8:r):f2
4u
DELTA5 p12:f2
(p3 ph9):f2
d0
d0
DELTA1 p10:f2 do:f1
(p24:sp7 ph11:r):f2
4u
p16:gp1
d16 p12:f2
(p0 ph10):f2
4u
p16:gp2
d16 p11:f1
4u
(p2 ph1):f1
DELTA2 p119:f1
DELTA3 cpds1:f1 p10:f2
(p24:sp7 ph11:r):f2
4u
DELTA7 p12:f2
d3 do:f1
4u p11:f1
(center (p1 ph1) (p3 ph5):f2 )
4u
DELTA6 p10:f2
(center (p2 ph1) (p24:sp7 ph12:r):f2 )
4u
DELTA6 p12:f2
(center (p1 ph2) (p3 ph6):f2 )
4u
DELTA4 p10:f2
(center (p2 ph1) (p14:sp3 ph1):f2 )
4u
DELTA4
(p1 ph1)
DELTA2
(p2 ph1)
4u
p16:gp3*EA
d16 p112:f2
go=2 ph31 cpd2:f2
d11 do:f2 mc #0 to 2 F1EA(calgrad(EA) & calph(ph6, +180), caldel(d0,
+in0))

```

```

4u BLKGRAD
exit

```

```

ph1=0
ph2=1
ph4=0 2
ph5=0 0 2 2
ph6=1 1 3 3
ph7=0
ph8=0
ph9=1 1 1 1 3 3 3 3
ph10=1 1 1 1 1 1 1 3 3 3 3 3 3 3
ph11=1
ph12=0
ph31=3 1 1 3 1 3 3 1 1 3 3 1 3 1 1 3

```

```

;p10 : 0W
;p11 : f1 channel - power level for pulse (default)
;p12 : f2 channel - power level for pulse (default)
;p112: f2 channel - power level for CPD/BB decoupling
;p119: f1 channel - power level for CPD/BB decoupling
;sp3: f2 channel - shaped pulse (180degree inversion)
;spnam3: Crp60,0.5,20.1
;sp7: f2 channel - shaped pulse (180degree refocussing)
;spnam7: Crp60comp.4
;p0 : f2 channel - 60 degree high power pulse
;p1 : f1 channel - 90 degree high power pulse
;p2 : f1 channel - 180 degree high power pulse
;p3 : f2 channel - 90 degree high power pulse
;p14: f2 channel - 180 degree shaped pulse for inversion
;      = 500usec for Crp60,0.5,20.1
;p16: homospoil/gradient pulse
;p24: f2 channel - 180 degree shaped pulse for refocussing
;      = 2msec for Crp60comp.4
;d0 : incremented delay (2D) [3 usec]
;d1 : relaxation delay; 1-5 * T1
;d3 : 1/2J(CH)
;d4 : 1/4J(CH)
;d11: delay for disk I/O [30 msec]
;d16: delay for homospoil/gradient recovery
;d23: 1/(4J(CC))
;cnst2 : J(CH) = 127 .. 160 Hz
;cnst3 : J(CC) = 4 .. 8 or 35 .. 55 Hz
;cnst17: = -0.5 for Crp60comp.4
;inf1: 1/SW(DQ-C) = 4 * DW(C)
;in0: 1/(2 * SW(DQ-C)) = 2 * DW(C)
;nd0: 2
;ns: 8 * n
;ds: >= 8
;td1: number of experiments
;FnMODE: echo-antiecho
;cpd1: decoupling according to sequence defined by cpdprg1 [waltz16]
;pcpd1: f1 channel - 90 degree pulse for decoupling sequence [60 usec]
;cpd2: decoupling according to sequence defined by cpdprg2
;pcpd2: f2 channel - 90 degree pulse for decoupling sequence

```

```
;for z-only gradients:  
;gpz1: +78.5%  
;gpz2: -77.6%  
;gpz3: -59%  
;gpz7: -23%
```

```
;use gradient files:  
;gpnam1: SMSQ10.100  
;gpnam2: SMSQ10.100  
;gpnam3: SMSQ10.100  
;gpnam7: SMSQ10.100
```

## 8. $^1J_{CH}$ -refocussed SQ ADEQUATE pulse program

```
;adeq11etgprdsp.js
;based on adeq11etgprdsp
;1,1/1,n-ADEQUATE: 2D-HSQC-1J(CC)/nJ(CC)-ADEQUATE
;  with refocussing of C chemical shift
;  using sensitivity improvement
;phase sensitive using Echo/Antiecho gradient selection
;with decoupling during acquisition
;using shaped pulses for 180degree pulses on f2 - channel
;
;with 1JCH refocussing and 1H decoupling for sensitivity improvement
;SQ in F1
;
;J. Sakas & D. Uhrin
;B. Reif, M. Koeck, R. Kerssebaum, H. Kang, W. Fenical & C. Griesinger
;  J. Magn. Reson. A118, 282-285 (1996).
;M. Koeck, R. Kerssebaum & W. Bermel, Magn. Reson. Chem. 41, 65-69 (2003)
;
;$CLASS=HighRes
;$DIM=2D
;$TYPE=
;$SUBTYPE=
;$COMMENT=

#include <Avance.incl>
#include <Delay.incl>
#include <Grad.incl>

"p2=p1*2"
"p0=p3*4/3"

"d0=3u"
"d11=30m"

"d3=1s/(cnst2*2)"
"d4=1s/(cnst2*4)"
"d23=1s/(cnst3*4)"

"in0=inf1/2"
"in20=in0"
"in21=in0"

"d20=d23-p24/2-d16-p16-d16-p16-p2-8u"
"d21=d23-p24/2-d3-20u"

"td1=tdmax(td1,d20*2,in20)"

"DELTA1=p16+d16+4u-2*d0"
"DELTA2=p16+d16+8u"
"DELTA4=d4-p14/2-4u"
"DELTA5=d23-p24/2-4u"
"DELTA6=d4-cnst17*p24/2-4u"
"DELTA7=d23-p24/2-4u-d3"
```

```

1 ze
  d11 p112:f2
2 d11 do:f2
  4u BLKGRAD
  d1 p12:f2
  (p3 ph1):f2
  4u p11:f1
  50u UNBLKGRAD
  p16:gp7
  d16
3 (p1 ph1)
  4u
  DELTA4 p10:f2
  (center (p2 ph1) (p14:sp3 ph1):f2 )
  4u
  DELTA4 p12:f2
  (p1 ph2) (p3 ph4):f2
  4u p10:f2 p119:f1
  d3
  DELTA7 cpds1:f1 ph1
  (p24:sp7 ph8):f2
  4u
  DELTA5 p12:f2
  (p3 ph9):f2
  d0
  d0
  DELTA1 p10:f2 do:f1
  (p24:sp7 ph11):f2
  4u
  p16:gp1
  d16 p12:f2
  (p0 ph10):f2
  4u
  p16:gp2
  d16 p11:f1
  4u
  (p2 ph1):f1
  DELTA2 p119:f1
  d20 p10:f2 cpds1:f1
  (p24:sp7 ph11):f2
  d21 p12:f2
  20u do:f1
  d3 p11:f1
  (center (p1 ph1) (p3 ph5):f2 )
  4u
  DELTA6 p10:f2
  (center (p2 ph1) (p24:sp7 ph1):f2 )
  4u
  DELTA6 p12:f2
  (center (p1 ph2) (p3 ph6):f2 )
  4u
  DELTA4 p10:f2
  (center (p2 ph1) (p14:sp3 ph1):f2 )
  4u
  DELTA4
  (p1 ph1)
  DELTA2

```

```

    (p2 ph1)
    4u
    p16:gp3*EA
    d16 p112:f2
    go=2 ph31 cpd2:f2
    d11 do:f2 mc #0 to 2 F1EA(calgrad(EA) & calph(ph6, +180), caldel(d0,
+in0) & caldel(d20, -in20) & caldel(d21, +in21))
    4u BLKGRAD
exit

```

```

ph1=0
ph2=1
ph4=0 2
ph5=0 0 2 2
ph6=1 1 3 3
ph7=0
ph8=0
ph9=1 1 1 1 3 3 3 3
ph10=1 1 1 1 1 1 1 3 3 3 3 3 3 3
ph11=1
ph31=3 1 1 3 1 3 3 1 1 3 3 1 3 1 1 3

```

```

;p10 : 0W
;p11 : f1 channel - power level for pulse (default)
;p12 : f2 channel - power level for pulse (default)
;p112: f2 channel - power level for CPD/BB decoupling
;sp3: f2 channel - shaped pulse (180degree inversion)
;spnam3: Crp60,0.5,20.1
;sp7: f2 channel - shaped pulse (180degree refocussing)
;spnam7: Crp60comp.4
;p0 : f2 channel - 120 degree high power pulse
;p1 : f1 channel - 90 degree high power pulse
;p2 : f1 channel - 180 degree high power pulse
;p3 : f2 channel - 90 degree high power pulse
;p14: f2 channel - 180 degree shaped pulse for inversion
;      = 500usec for Crp60,0.5,20.1
;p16: homospoil/gradient pulse
;p24: f2 channel - 180 degree shaped pulse for refocussing
;      = 2msec for Crp60comp.4
;d0 : incremented delay (2D) [3 usec]
;d1 : relaxation delay; 1-5 * T1
;d3 : 1/2J(CH)
;d4 : 1/4J(CH)
;d11: delay for disk I/O [30 msec]
;d16: delay for homospoil/gradient recovery
;d20: decremented delay (2D)
;d21: incremented delay (2D)
;d23: 1/(4J(CC))
;cnst2 : J(CH) = 127 .. 160 Hz
;cnst3 : J(CC) = 4 .. 8 or 35 .. 55 Hz
;cnst17: = -0.5 for Crp60comp.4
;inf1: 1/SW(C) = 2 * DW(C)
;in0: 1/(2 * SW(C)) = DW(C)
;nd0: 2
;in20: = in0

```

```

;in21: = in0
;ns: 8 * n
;ds: >= 8
;td1: number of experiments
;FnMODE: echo-antiecho
;cpd1: decoupling according to sequence defined by cpdprg1      [waltz16]
;pcpd1: f1 channel - 90 degree pulse for decoupling sequence  [60 usec]
;cpd2: decoupling according to sequence defined by cpdprg2
;pcpd2: f2 channel - 90 degree pulse for decoupling sequence

;for z-only gradients:
;gpz1: +78.5%
;gpz2: -77.6%
;gpz3: -59%
;gpz7: -23%

;use gradient files:
;gpnam1: SMSQ10.100
;gpnam2: SMSQ10.100
;gpnam3: SMSQ10.100
;gpnam7: SMSQ10.100

```
